# Supplementary material for: 1-n-Butyl-3-methylimidazolium-2-carboxylate: a versatile precatalyst for the ring-opening polymerization of ε-caprolactone and rac-lactide under solvent-free conditions
Source: publisher site journal article supplement (doi:10.3762/bjoc.9.73), 2013-04-03
Supplement: Additional file 1 [file 1860-5397-9-73-S1.pdf]

# Supporting Information – File 1

for

## **1-*n*-Butyl-3-methylimidazolium-2-carboxylate: a versatile precatalyst for the ring-opening polymerization of $\epsilon$ -caprolactone and *rac*-lactide under solvent-free conditions**

Astrid Hoppe, Faten Sadaka, Claire-Hélène Brachais, Gilles Boni, Jean-Pierre Couvercelle and Laurent Plasseraud\*

Address: Institut de Chimie Moléculaire de l'Université de Bourgogne (ICMUB), UMR CNRS 6302,  
9 Avenue A. Savary, BP 47870, F-21078 Dijon, France

E-mail: Laurent Plasseraud\* - laurent.plasseraud@u-bourgogne.fr

\*Corresponding author

### **Experimental details and characterization of the compounds synthesized**

# Table of contents

|                                                                                          |     |
|------------------------------------------------------------------------------------------|-----|
| <b>1. General considerations</b>                                                         | S3  |
| <b>2. Characterization</b>                                                               | S3  |
| <b>3. Synthesis of BMIM-2-CO<sub>2</sub> used as precatalyst</b>                         | S4  |
| <b>4. Polymer synthesis</b>                                                              | S4  |
| 4.1. Synthesis of polycaprolactone (PCL) - Method A                                      | S4  |
| 4.1.1. Using benzyl alcohol as initiator                                                 | S4  |
| 4.1.2. Synthesis of PCL using ethylene glycol as initiator                               | S5  |
| 4.1.3. Synthesis of PCL using glycerol as initiator                                      | S6  |
| 4.1.4. Synthesis of PCL using pentaerythritol as initiator                               | S6  |
| 4.2. Synthesis of polycaprolactone (PCL) - Method B                                      | S7  |
| 4.2.1 Using benzyl alcohol as initiator and NaBPh <sub>4</sub> as decarboxylation agent  | S7  |
| 4.3 Synthesis of Polylactide (PLA) - Method A                                            | S7  |
| 4.3.1 Using benzyl alcohol as initiator                                                  | S7  |
| 4.3.2 Using ethylene glycol as initiator                                                 | S8  |
| 4.3.3 Using glycerol as initiator                                                        | S9  |
| 4.4 Synthesis of polylactide (PLA) - Method B                                            | S9  |
| 4.4.1. Using benzyl alcohol as initiator and NaBPh <sub>4</sub> as decarboxylation agent | S9  |
| 4.4.2 Using ethylene glycol as initiator and NaBPh <sub>4</sub> as decarboxylation agent | S10 |
| <b>5. References</b>                                                                     | S11 |

## 1. General considerations

All polymerization reactions were prepared in a glove box (JACOMEX) under argon and then performed either in vacuo or in the glove box.  $\epsilon$ -Caprolactone ( $\epsilon$ -CL) was acquired from Aldrich, distilled in vacuo over  $\text{CaH}_2$  and dried on 3 Å molecular sieve. 3,6-Dimethyl-1,4-dioxan-2,5-dione (*rac*-lactide, *rac*-LA) was purchased from Aldrich and used as received. Benzyl alcohol, ethylene glycol, glycerol and pentaerythritol (all from Aldrich) were distilled in vacuo and dried on 3 Å molecular sieves. Dimethyl carbonate (DMC) was purchased from Aldrich and was distilled over anhydrous  $\text{K}_2\text{CO}_3$  prior to use. The precatalyst, 1-*n*-butyl-3-methylimidazolium-2-carboxylate (BMIM-2- $\text{CO}_2$ ), was synthesized as reported in the literature [1,2]. Sodium tetrafluoroborate 98% ( $\text{NaBF}_4$ ), deuterated chloroform (both from Aldrich), and sodium tetrphenylborate 98% ( $\text{NaBPh}_4$ ) purchased from Fluka AG were used as received. Methanol was dried and distilled under argon from  $\text{Mg}(\text{OCH}_3)_2$ , while diethyl ether and tetrahydrofuran (THF) were dried and distilled under argon over Na/benzophenone prior to use.

## 2. Characterization

$^1\text{H}$  NMR and  $^{13}\text{C}\{^1\text{H}\}$  NMR spectroscopy analyses were recorded in  $\text{CDCl}_3$  with a Bruker Avance (300 MHz) spectrometer with the solvent proton/carbon signal as internal standard at the Plateforme d'Analyses Chimiques et de Synthèse Moléculaire de l'Université de Bourgogne (PACSMUB). Gel permeation chromatography (GPC) to determine the molecular weights and the polydispersity (PDI) of synthesized polymers was performed on a Gynkotek high-pressure liquid chromatographic system equipped with a P580A separation module, two PolyPore columns from Polymer Laboratories (300 mm  $\times$  7.5 mm) and a IOTA 2 refractive index detector (Precision Instruments). Tetrahydrofuran (THF) was used as eluent at a flow rate of 1  $\text{mL}\cdot\text{min}^{-1}$ ; polystyrene samples (PS) of known molecular weight served as a calibration standard. Thermogravimetric analysis (TGA) was carried out with a TA Instruments TGA Q500 thermoanalyser using aluminium pans. Samples were heated from 20 °C to 250 °C at a rate of 10  $^\circ\text{C}\cdot\text{min}^{-1}$ . Differential scanning calorimetry (DSC) was performed on a DSC Q

1000 thermal analyzer. The instrument was calibrated using indium standard. Samples were heated from  $-90\text{ }^{\circ}\text{C}$  to  $100\text{ }^{\circ}\text{C}$  at a heating rate of  $10\text{ }^{\circ}\text{C}\cdot\text{min}^{-1}$ .

### 3. Synthesis of BMIM-2-CO<sub>2</sub> used as precatalyst

In a Schlenk tube under argon atmosphere, is introduced 2.90 mL (22 mmol) of 1-*n*-butylimidazole, 4 mL (47.5 mmol) of dimethyl carbonate (DMC), and 25 mL of methanol. The mixture is transferred via cannula into a 70 mL stainless steel batch reactor previously purged under argon. The mixture is stirred and heated to  $135\text{ }^{\circ}\text{C}$  for 7 h. The mixture is then transferred into a flask and methanol is evaporated under reduced pressure (trap-to-trap distillation). The pale yellow viscous residue obtained is washed with  $4 \times 20\text{ mL}$  of dry diethyl ether. The solid product thus obtained is dried overnight under reduced pressure to give pure BMIM-2-CO<sub>2</sub> as a white powder in 66%.

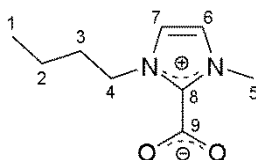

<sup>1</sup>H NMR (D<sub>2</sub>O, 300 MHz):  $\delta = 0.85$  (m, 3H, H<sup>1</sup>),  $1.23$  (m, 2H, H<sup>2</sup>),  $1.75$  (m, 2H, H<sup>3</sup>),  $3.89$  (s, 3H, H<sup>5</sup>),  $4.33$  (m, 2H, H<sup>4</sup>),  $7.32$  (d, 1H,  $J = 2.0\text{ Hz}$ , H<sup>7</sup>),  $7.37$  (d, 1H,  $J = 2.0\text{ Hz}$ , H<sup>6</sup>) ppm; <sup>13</sup>C{<sup>1</sup>H} NMR (D<sub>2</sub>O, 75 MHz):  $\delta = 13.0$  (C<sup>1</sup>),  $19.2$  (C<sup>2</sup>),  $32.3$  (C<sup>3</sup>),  $36.8$  (C<sup>5</sup>),  $49.7$  (C<sup>4</sup>),  $122.1$  (C<sup>7</sup>),  $123.5$  (C<sup>6</sup>),  $140.3$  (C<sup>8</sup>),  $158.8$  (C<sup>9</sup>) ppm.

## 4. Polymer synthesis

### 4.1. Synthesis of polycaprolactone (PCL) - Method A

#### 4.1.1. Using benzyl alcohol as initiator

In the glove box, a mixture of 1-*n*-butyl-3-methylimidazolium-2-carboxylate (BMIM-2-CO<sub>2</sub>) (0.010 g, 0.057 mmol),  $\epsilon$ -caprolactone (1.00 mL, 1.030 g, 9.02 mmol) and benzyl alcohol (0.01 mL, 0.011 g, 0.10 mmol) were stirred and heated in vacuo for 75 min to  $75\text{ }^{\circ}\text{C}$ .

Conversion = 100%

$^1\text{H}$  NMR (300.13 MHz, 298 K,  $\text{CDCl}_3$ )  $\delta$  = 7.32 (s, 5H,  $\text{H}^{9-11}$ ), 5.08 (s, 2H,  $\text{H}^7$ ), 4.00–4.05 (t, 2H,  $\text{H}^6$ ), 3.57–3.61 (t, 2H,  $\text{H}^{12}$ ), 2.28–2.37 (m, 2H,  $\text{H}^2$ ), 1.59–1.65 (m, 4H,  $\text{H}^{3,5}$ ), 1.35–1.37 (m, 2H,  $\text{H}^4$ );  $^{13}\text{C}\{^1\text{H}\}$  NMR (75.47 MHz, 298 K,  $\text{CDCl}_3$ )  $\delta$  = 173.51 ( $\text{C}^1$ ), 135.89 ( $\text{C}^8$ ), 128.06–128.43 ( $\text{C}^{9-11}$ ), 66.04 ( $\text{C}^7$ ), 64.03 ( $\text{C}^6$ ), 62.25 ( $\text{C}^{12}$ ), 33.99 ( $\text{C}^2$ ), 28.21 ( $\text{C}^5$ ), 25.40 ( $\text{C}^4$ ), 24.44 ( $\text{C}^3$ ).

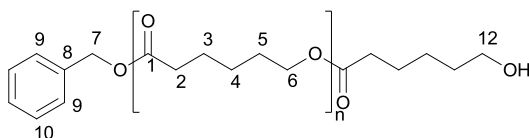

$M_n$  (versus PS standards) =  $2950 \text{ g}\cdot\text{mol}^{-1}$ ,  $M_w/M_n = 1.40$

$M_n$  (determined by  $^1\text{H}$  NMR spectroscopy) =  $2730 \text{ g}\cdot\text{mol}^{-1}$ .

#### 4.1.2. Synthesis of PCL using ethylene glycol as initiator

In the glove box, 1-*n*-butyl-3-methylimidazolium-2-carboxylate (BMIM-2- $\text{CO}_2$ ) (0.009 g, 0.052 mmol),  $\epsilon$ -caprolactone (1.00 mL, 1.030 g, 9.02 mmol) and ethylene glycol (0.05 mL, 0.555 g, 0.89 mmol) were combined and heated in vacuo for 75 min to 75 °C.

Conversion = 100%

$^1\text{H}$  NMR (300.13 MHz, 298 K,  $\text{CDCl}_3$ )  $\delta$  = 4.25 (m, 2H,  $\text{H}^8$ ), 4.16–4.19 (t, 2H,  $\text{H}^9$ ), 4.00–4.05 (t, 2H,  $\text{H}^6$ ), 3.58–3.62 (t, 2H,  $\text{H}^7$ ), 2.26–2.34 (m, 2H,  $\text{H}^2$ ), 1.51–1.64 (m, 4H,  $\text{H}^{3,5}$ ), 1.35–1.39 (m, 2H,  $\text{H}^4$ );  $^{13}\text{C}\{^1\text{H}\}$  NMR (75.47 MHz, 298 K,  $\text{CDCl}_3$ )  $\delta$  = 173.59 ( $\text{C}^1$ ), 65.86 ( $\text{C}^8$ ), 64.05 ( $\text{C}^6$ ), 62.29 ( $\text{C}^9$ ), 62.00 ( $\text{C}^7$ ), 34.15 ( $\text{C}^2$ ), 28.24 ( $\text{C}^5$ ), 25.43 ( $\text{C}^4$ ), 24.48 ( $\text{C}^3$ ).

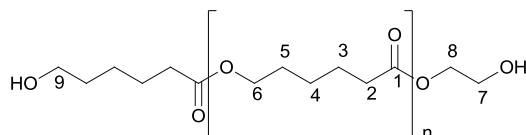

$M_n$  (versus PS standards) =  $490 \text{ g}\cdot\text{mol}^{-1}$ ,  $M_w/M_n = 1.86$

$M_n$  (determined by  $^1\text{H}$  NMR spectroscopy) =  $600 \text{ g}\cdot\text{mol}^{-1}$ .

#### 4.1.3. Synthesis of PCL using glycerol as initiator

In the glove box, 1-*n*-butyl-3-methylimidazolium-2-carboxylate (BMIM-2-CO<sub>2</sub>) (0.009 g, 0.052 mmol), ε-caprolactone (1.00 mL, 1.030 g, 9.02 mmol) and glycerol (0.10 mL, 0.126 g, 1.37 mmol) were combined and heated in vacuo for 75 min to 75 °C.

Conversion = 100%

<sup>1</sup>H NMR (300.13 MHz, 298 K, CDCl<sub>3</sub>) δ = 4.12–4.14 (m, 2H, H<sup>10</sup>), 4.00–4.11 (t, 2H, H<sup>6</sup>), 3.58–3.62 (t, 2H, H<sup>7</sup>/H<sup>8</sup>), 2.26–2.36 (m, 2H, H<sup>2</sup>), 1.53–1.64 (m, 4H, H<sup>3,5</sup>), 1.35–1.38 (m, 2H, H<sup>4</sup>); <sup>13</sup>C{<sup>1</sup>H} NMR (75.47 MHz, 298 K, CDCl<sub>3</sub>) δ = 173.55 (C<sup>1</sup>), 70.01 (C<sup>9</sup>), 64.99 (C<sup>10</sup>), 64.09 (C<sup>6</sup>), 63.22 (C<sup>7</sup>), 62.35 (C<sup>8</sup>), 34.15 (C<sup>2</sup>), 28.24 (C<sup>5</sup>), 25.43 (C<sup>4</sup>), 24.48 (C<sup>3</sup>).

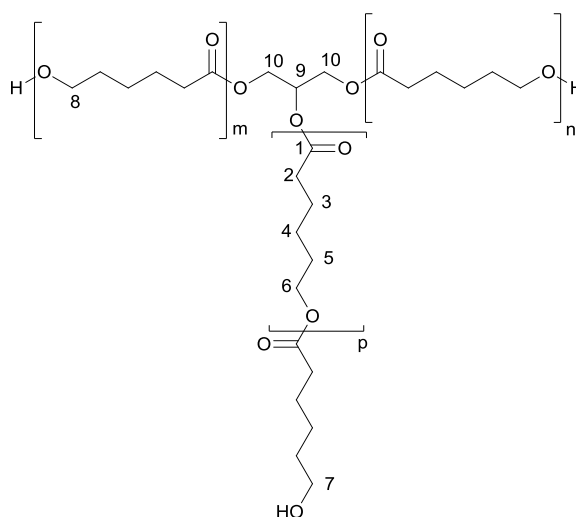

$M_n$  (versus PS standards) = 830 g·mol<sup>-1</sup>,  $M_w/M_n$  = 1.98

$M_n$  (determined by <sup>1</sup>H NMR spectroscopy) = 770 g·mol<sup>-1</sup>.

#### 4.1.4. Synthesis of PCL using pentaerythritol as initiator

In a glove box, 1-*n*-butyl-3-methylimidazolium-2-carboxylate (BMIM-2-CO<sub>2</sub>) (0.010 g, 0.055 mmol), ε-caprolactone (1.00 mL, 1.030 g, 9.02 mmol) and pentaerythritol (0.130 g, 0.96 mmol) were combined and heated in vacuo for 75 min to 75 °C.

Conversion = 100%

<sup>1</sup>H NMR (300.13 MHz, 298 K, CDCl<sub>3</sub>) δ = 4.08–4.15 (m, 2H, H<sup>7</sup>), 4.00–4.05 (t, 2H, H<sup>6</sup>), 3.55–3.62 (m, 2H, H<sup>8</sup>), 2.25–2.30 (t, 2H, H<sup>2</sup>), 1.58–1.63 (m, 4H, H<sup>3,5</sup>), 1.35–1.37 (m, 2H, H<sup>4</sup>); <sup>13</sup>C{<sup>1</sup>H} NMR

(75.47 MHz, 298 K, CDCl<sub>3</sub>)  $\delta$  = 173.49 (C<sup>1</sup>), 64.05 (C<sup>6</sup>), 62.34 (C<sup>7</sup>), 34.01 (C<sup>2</sup>), 28.23 (C<sup>5</sup>), 25.42 (C<sup>4</sup>), 24.46 (C<sup>3</sup>).

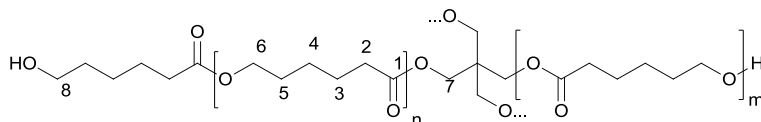

$M_n$  (versus PS standards) = 2340 g·mol<sup>-1</sup>,  $M_w/M_n$  = 1.66

$M_n$  (determined by <sup>1</sup>H NMR spectroscopy) = 593 g·mol<sup>-1</sup>.

## 4.2. Synthesis of polycaprolactone (PCL) - Method B

### 4.2.1 Using benzyl alcohol as initiator and NaBPh<sub>4</sub> as decarboxylation agent

In a glove box, 1-*n*-butyl-3-methylimidazolium-2-carboxylate (BMIM-2-CO<sub>2</sub>) (0.010 g, 0.057 mmol),  $\epsilon$ -caprolactone (1.00 mL, 1.030 g, 9.02 mmol), sodium tetraphenylborate (0.011 g, 0.033 mmol), and benzyl alcohol (0.10 mL, 0.104 g, 0.96 mmol) were combined and heated for 75 min to 75 °C.

Conversion = 67%

<sup>1</sup>H NMR (300.13 MHz, 298 K, CDCl<sub>3</sub>)  $\delta$  = 7.31 (s, 5 H, H<sup>9-11</sup>), 4.17–4.20 (t, 2 H, H<sup>6</sup>), 4.01–4.04 (t, 2 H, H<sup>6</sup>), 3.56–3.66 (m, 2 H, H<sup>12</sup>), 2.58–2.61 (t, 2 H, H<sup>2</sup>), 2.24–2.33 (m, 2 H, H<sup>2</sup>), 1.72–1.82 (m, 6 H, H<sup>3-5</sup>), 1.58–1.61 (m, 4 H, H<sup>3-5</sup>), 1.34–1.36 (m, 2 H, H<sup>4</sup>).

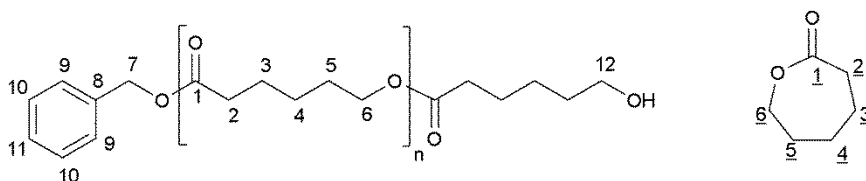

$M_n$  (versus PS standards) = 515 g·mol<sup>-1</sup>,  $M_w/M_n$  = 1.38

$M_n$  (determined by <sup>1</sup>H NMR) = 565 g·mol<sup>-1</sup>.

## 4.3 Synthesis of polylactide (PLA) - Method A

### 4.3.1 Using benzyl alcohol as initiator

In a glove box, 1-*n*-butyl-3-methylimidazolium-2-carboxylate (BMIM-2-CO<sub>2</sub>) (0.011 g, 0.060 mmol), *rac*-lactide (0.996 g, 6.91 mmol) and benzyl alcohol (0.10 mL, 0.104 g, 0.96 mmol) were combined and heated in vacuo for 75 min to 75 °C.

Conversion = 67%

$^1\text{H}$  NMR (300.13 MHz, 298 K,  $\text{CDCl}_3$ )  $\delta$  = 7.33 (s, 5H,  $\text{H}^{6-8}$ ), 5.13–5.20 (m, 1H,  $\text{H}^2$ ), 5.00–5.07 (q, 1H,  $\text{H}^2$ ), 4.31–4.35 (m, 2H,  $\text{H}^{4,9}$ ), 1.63–1.65 (d, 3H,  $\text{H}^3$ ), 1.45–1.57 (m, 3H,  $\text{H}^3$ );  $^{13}\text{C}\{^1\text{H}\}$  NMR (75.47 MHz, 298 K,  $\text{CDCl}_3$ )  $\delta$  = 169.5 ( $\text{C}^1$ ), 167.5 ( $\text{C}^1$ ), 135.0 ( $\text{C}^5$ ) 126.8 & 128.53 ( $\text{C}^{6-8}$ ), 72.34 ( $\text{C}^2$ ), 68.9 ( $\text{C}^9$ ), 67.1 ( $\text{C}^2$ ), 66.6 ( $\text{C}^4$ ), 20.3 ( $\text{C}^{10}$ ), 16.5 ( $\text{C}^3$ ), 15.6 ( $\text{C}^3$ ).

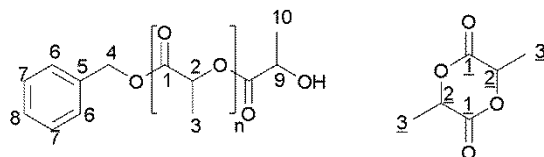

$M_n$  (versus PS standards) =  $270 \text{ g}\cdot\text{mol}^{-1}$ ,  $M_w/M_n = 1.66$

$M_n$  (determined by  $^1\text{H}$  NMR spectroscopy) =  $451 \text{ g}\cdot\text{mol}^{-1}$

#### 4.3.2 Using ethylene glycol as initiator

In a glove box, 1-*n*-butyl-3-methylimidazolium-2-carboxylate (BMIM-2- $\text{CO}_2$ ) (0.010 g, 0.054 mmol), *rac*-lactide (1.011 g, 7.02 mmol) and ethylene glycol (0.10 mL, 0.111 g, 1.79 mmol) were combined and heated in vacuo for 75 min to  $75^\circ\text{C}$ .

Conversion = 48%

$^1\text{H}$  NMR (300.13 MHz, 298 K,  $\text{CDCl}_3$ )  $\delta$  = 5.12–5.18 (q, 1H,  $\text{H}^2$ ), 5.01–5.08 (q, 1H,  $\text{H}^2$ ), 4.31–4.34 (m, 3H,  $\text{H}^{4,6}$ ), 1.61–1.64 (d, 3H,  $\text{H}^3$ ), 1.44–1.57 (m, 6H,  $\text{H}^{3,7}$ );  $^{13}\text{C}\{^1\text{H}\}$  NMR (75.47 MHz, 298 K,  $\text{CDCl}_3$ )  $\delta$  = 169.50 ( $\text{C}^1$ ), 167.48 ( $\text{C}^1$ ), 134.97 ( $\text{C}^5$ ) 126.84–128.53 ( $\text{C}^{6-8}$ ), 72.34 ( $\text{C}^2$ ), 68.91 ( $\text{C}^9$ ), 67.10 ( $\text{C}^2$ ), 66.58 ( $\text{C}^4$ ), 20.29 ( $\text{C}^{10}$ ), 16.52 ( $\text{C}^3$ ), 15.62 ( $\text{C}^3$ ).

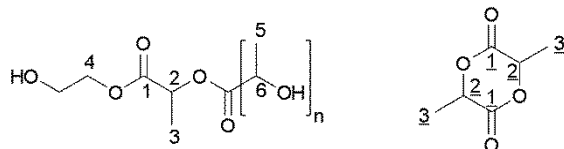

$M_n$  (versus PS standards) =  $353 \text{ g}\cdot\text{mol}^{-1}$ ,  $M_w/M_n = 1.21$

$M_n$  (determined by  $^1\text{H}$  NMR spectroscopy) =  $494 \text{ g}\cdot\text{mol}^{-1}$ .



### 4.3.3 Using glycerol as initiator

In a glove box, 1-*n*-butyl-3-methylimidazolium-2-carboxylate (BMIM-2-CO<sub>2</sub>) (0.010 g, 0.058 mmol), *rac*-lactide (1.012 g, 7.02 mmol) and glycerol (0.10 mL, 0.126 g, 1.37 mmol) were combined and heated in vacuo for 75 min to 75 °C.

Conversion = 50%

<sup>1</sup>H NMR (300.13 MHz, 298 K, CDCl<sub>3</sub>) δ = 5.11–5.15 (m, 1H, H<sup>2</sup>), 5.01–5.08 (q, 1H, H<sup>2</sup>), 4.33–4.35 (m, 2 H, H<sup>7</sup>), 4.18–4.22 (m, 2H, H<sup>8</sup>), 1.63–1.65 (d, 3H, H<sup>3</sup>), 1.45–1.54 (m, 6H, H<sup>3,5</sup>); <sup>13</sup>C{<sup>1</sup>H} NMR (75.47 MHz, 298 K, CDCl<sub>3</sub>) δ = 170.21 (C<sup>1</sup>), 167.48 (C<sup>1</sup>), 72.41 (C<sup>2</sup>), 69.39 (C<sup>6</sup>), 67.36 (C<sup>4</sup>), 66.74 (C<sup>2</sup>), 65.54 (C<sup>7</sup>), 20.23 (C<sup>5</sup>), 16.67 (C<sup>3</sup>), 15.69 (C<sup>3</sup>).

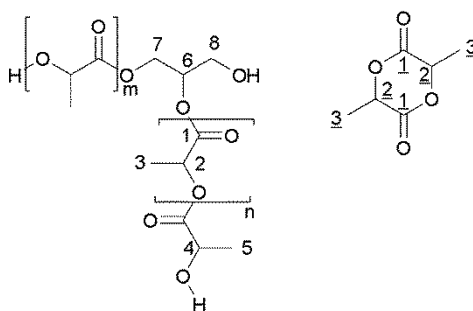

$M_n$  (versus PS standards) = 390 g·mol<sup>-1</sup>,  $M_w/M_n$  = 1.16

$M_n$  (determined by <sup>1</sup>H NMR spectroscopy) = 524 g·mol<sup>-1</sup>.

## 4.4 Synthesis of polylactide (PLA) - Method B

### 4.4.1. Using benzyl alcohol as initiator and NaBPh<sub>4</sub> as decarboxylation agent

In a glove box, 1-*n*-butyl-3-methylimidazolium-2-carboxylate (BMIM-2-CO<sub>2</sub>) (0.010 g, 0.055 mmol), *rac*-lactide (0.973 g, 6.75 mmol), sodium tetraphenylborate (0.011 g, 0.033 mmol), and benzyl alcohol (0.10 mL, 0.104 g, 0.96 mmol) were combined and heated for 75 min to 75 °C.

Conversion = 83%

<sup>1</sup>H NMR (300.13 MHz, 298 K, CDCl<sub>3</sub>) δ = 7.33–7.36 (m, 5H, H<sup>6-8</sup>), 5.14–5.23 (m, 1H, H<sup>2</sup>), 5.00–5.06 (q, 1H, H<sup>2</sup>), 4.30–4.39 (m, 2H, H<sup>4,9</sup>), 1.67–1.69 (d, 3H, H<sup>3</sup>), 1.42–1.61 (m, 3H, H<sup>3</sup>); <sup>13</sup>C{<sup>1</sup>H} NMR

(75.47 MHz, 298 K, CDCl<sub>3</sub>)  $\delta$  = 169.53 (C<sup>1</sup>), 167.45 (C<sup>1</sup>), 134.98 (C<sup>5</sup>) 126.89–128.56 (C<sup>6–8</sup>), 72.38 (C<sup>2</sup>), 69.30 (C<sup>9</sup>), 67.15 (C<sup>2</sup>), 66.60 (C<sup>4</sup>), 20.33 (C<sup>10</sup>), 16.73 (C<sup>3</sup>), 15.66 (C<sup>3</sup>).

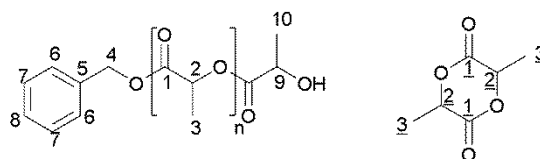

$M_n$  (versus PS standards) = 298 g·mol<sup>-1</sup>,  $M_w/M_n$  = 1.59

$M_n$  (determined by <sup>1</sup>H NMR spectroscopy) = 540 g·mol<sup>-1</sup>.

#### 4.4.2 Using ethylene glycol as initiator and NaBPh<sub>4</sub> as decarboxylation agent

In the glove box 1-*n*-butyl-3-methylimidazolium-2-carboxylate (BMIM-2-CO<sub>2</sub>) (0.010 g, 0.056 mmol), *rac*-lactide (0.614 g, 4.26 mmol), sodium tetraphenylborate (0.011 g, 0.033 mmol), and ethylene glycol (0.10 mL, 0.104 g, 0.96 mmol) were combined and heated for 75 min to 75 °C.

Conversion = 90%

<sup>1</sup>H NMR (300.13 MHz, 298 K, CDCl<sub>3</sub>)  $\delta$  = 6.95–7.00 (m, 5H, H<sup>1–3</sup>), 5.13–5.19 (m, 1H, H<sup>2</sup>), 4.97–5.03 (q, 1H, H<sup>2</sup>), 4.24–4.35 (m, 2H, H<sup>4</sup> & 1H, H<sup>6</sup>), 1.61–1.64 (d, 3H, H<sup>3</sup>), 1.45–1.58 (m, 3H, H<sup>3</sup> & 3H, H<sup>5</sup>);

<sup>13</sup>C{<sup>1</sup>H} NMR (75.47 MHz, 298 K, CDCl<sub>3</sub>)  $\delta$  = 170.49 (C<sup>1</sup>), 167.49 (C<sup>1</sup>), 135.71 (C<sup>4</sup>) 125.82–125.89 (C<sup>1–3</sup>), 72.38 (C<sup>2</sup>), 69.44 (C<sup>5</sup>), 66.82 (C<sup>2</sup>), 63.54 (C<sup>4</sup>), 20.23 (C<sup>5</sup>), 16.69 (C<sup>3</sup>), 15.66 (C<sup>3</sup>).

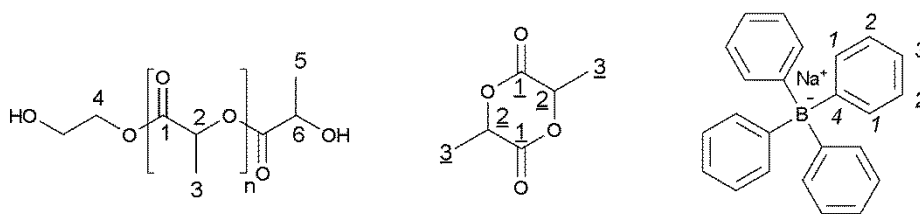

$M_n$  (versus PS standards) = 246 g·mol<sup>-1</sup>,  $M_w/M_n$  = 1.33

$M_n$  (determined by <sup>1</sup>H NMR spectroscopy) = 813 g·mol<sup>-1</sup>.

## 5. References

1. Holbrey, J. D.; Reichert, W. M.; Tkatchenko, I.; Bouajila, E.; Walter, O.; Tommasi, I.; Rogers, R. D. *Chem. Commun.* **2003**, 28–29. doi:[10.1039/b211519k](https://doi.org/10.1039/b211519k)
2. Naik, P. U.; Petitjean, L.; Refes, K.; Picquet, M.; Plasseraud, L. *Adv. Synth. Catal.* **2009**, *351*, 1753–1756. doi:[10.1002/adsc.200900280](https://doi.org/10.1002/adsc.200900280)
