# Supplementary material for: 1-n-Butyl-3-methylimidazolium-2-carboxylate: a versatile precatalyst for the ring-opening polymerization of ε-caprolactone and rac-lactide under solvent-free conditions
Source: publisher site journal article supplement (doi:10.3762/bjoc.9.73), 2013-04-03
Supplement: Additional file 2 [file 1860-5397-9-73-S2.pdf]

## Supporting Information – File 2

for

### **1-*n*-Butyl-3-methylimidazolium-2-carboxylate: a versatile precatalyst for the ring-opening polymerization of $\epsilon$ -caprolactone and *rac*-lactide under solvent-free conditions**

Astrid Hoppe, Faten Sadaka, Claire-Hélène Brachais, Gilles Boni, Jean-Pierre Couvercelle and Laurent Plasseraud\*

Address: Institut de Chimie Moléculaire de l'Université de Bourgogne (ICMUB), UMR CNRS 6302,  
9 Avenue A. Savary, BP 47870, F-21078 Dijon, France

E-mail: Laurent Plasseraud\* - laurent.plasseraud@u-bourgogne.fr

\*Corresponding author

### **Differential scanning calorimetry (DSC) profiles**

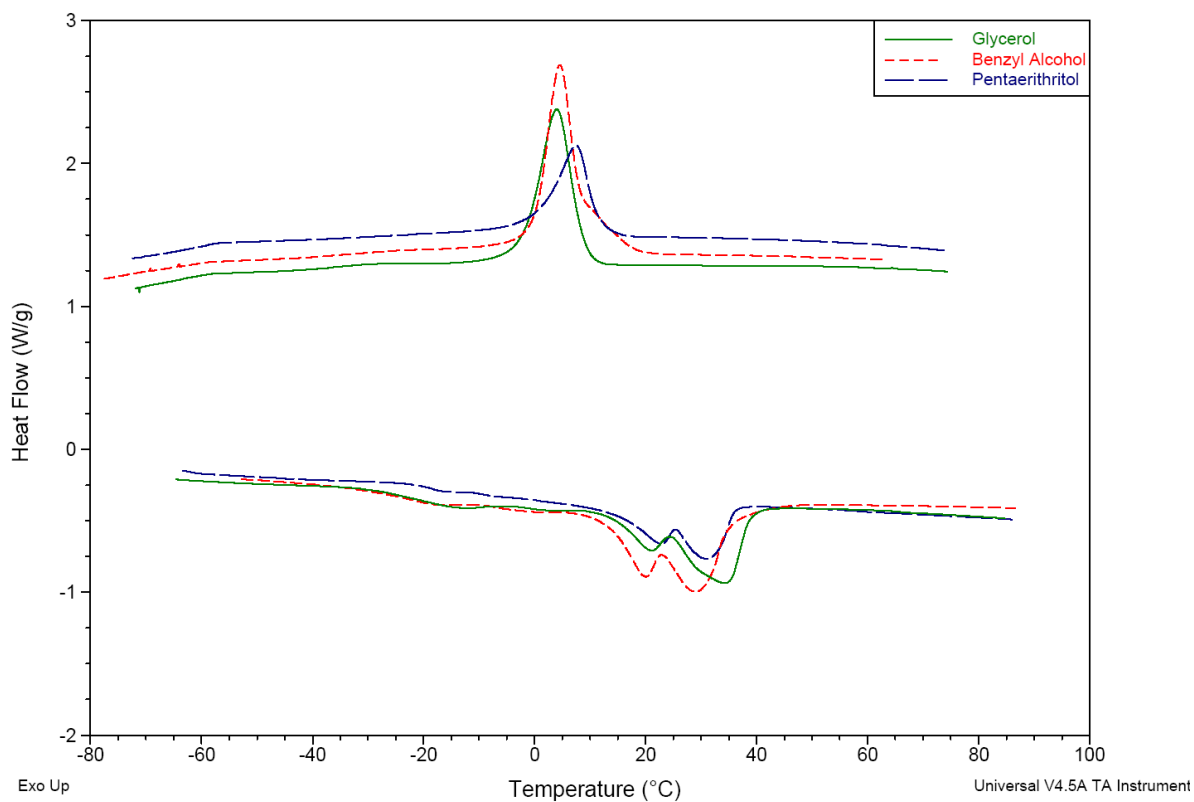

**Figure S1:** DSC analyses for entries 1b, 3b and 4b (Table 4).
